# Supplementary material for: The effect of nitrido, azide, and nitrosyl ligands on magnetization densities and magnetic properties of iridium PNP pincer-type complexes
Source: Royal Society of Chemistry journal article supplement (doi:10.1039/c5ra17507k), 2015-01-01
Supplement: c5ra17507k1.pdf [file c5ra17507k1.pdf]

# The Effect of Nitrido, Azide, and Nitrosyl Ligands on Magnetization Densities and Magnetic Properties of Iridium PNP Pincer-Type Complexes

Daniel Stuart,<sup>a,b</sup> Paweł Tecmer,<sup>a,c\*</sup> Paul W. Ayers,<sup>a</sup> and Katharina Boguslawski<sup>c\*</sup>

<sup>a</sup>Department of Chemistry and Chemical Biology, McMaster University, Hamilton, 1280 Main Street West, L8S 4M1, Canada

<sup>b</sup>Department of Chemistry and Biochemistry, University of Lethbridge, 4401 University Drive, Lethbridge, Alberta, T1K 3M4, Canada

<sup>c</sup>Present address: Institute of Physics, Faculty of Physics, Astronomy and Informatics, Nicolaus Copernicus University, Grudziądzka 5, 87-100 Toruń, Poland

\*Corresponding Authors: E-mail: ptecmer@gmail.com; katharina.boguslawski@gmail.com

**Supporting Information**

**Table S1.** Complex 1 coordinates used in calculations.Iridium Nitrido Complex—Coordinates

|      |           |          |           |
|------|-----------|----------|-----------|
| 1.Ir | 3.108815  | 4.144296 | 3.001956  |
| 2.P  | 4.907875  | 5.688703 | 3.153434  |
| 3.P  | 0.837854  | 3.435935 | 2.898634  |
| 4.N  | 2.034958  | 6.08844  | 2.938375  |
| 5.N  | 3.953393  | 2.625572 | 3.028754  |
| 6.C  | 2.732862  | 7.260266 | 2.990219  |
| 7.H  | 2.157012  | 8.195242 | 2.94871   |
| 8.C  | 4.095759  | 7.288678 | 3.091576  |
| 9.H  | 4.638609  | 8.232747 | 3.122954  |
| 10.C | 0.672651  | 6.119803 | 2.857444  |
| 11.H | 0.189638  | 7.106257 | 2.824084  |
| 12.C | -0.077561 | 4.978085 | 2.816741  |
| 13.H | -1.164744 | 5.020588 | 2.760415  |
| 14.C | 6.082773  | 5.599712 | 1.633621  |
| 15.C | 6.696363  | 4.194524 | 1.493714  |
| 16.H | 7.217387  | 4.129755 | 0.5238    |
| 17.H | 5.92251   | 3.412848 | 1.520225  |
| 18.H | 7.43257   | 3.976937 | 2.278376  |
| 19.C | 7.192912  | 6.664863 | 1.677479  |
| 20.H | 7.713242  | 6.677831 | 0.705351  |
| 21.H | 7.946563  | 6.447562 | 2.446021  |
| 22.H | 6.79355   | 7.674833 | 1.850792  |
| 23.C | 5.172167  | 5.864659 | 0.41603   |
| 24.H | 4.740373  | 6.874886 | 0.4431    |
| 25.H | 4.344934  | 5.140474 | 0.381232  |
| 26.H | 5.769881  | 5.762693 | -0.504911 |
| 27.C | 5.840218  | 5.628166 | 4.83389   |
| 28.C | 4.730726  | 5.57711  | 5.905234  |
| 29.H | 5.198817  | 5.567565 | 6.903795  |
| 30.H | 4.111117  | 4.676978 | 5.789816  |
| 31.H | 4.070865  | 6.454484 | 5.84127   |
| 32.C | 6.704526  | 4.36011  | 4.943983  |
| 33.H | 7.59843   | 4.41094  | 4.307408  |
| 34.H | 6.134109  | 3.456607 | 4.680655  |
| 35.H | 7.049229  | 4.251288 | 5.985855  |
| 36.C | 6.692157  | 6.88824  | 5.076328  |
| 37.H | 6.087825  | 7.803841 | 5.003697  |
| 38.H | 7.537988  | 6.971992 | 4.382768  |
| 39.H | 7.105446  | 6.845406 | 6.097723  |
| 40.C | 0.374881  | 2.465003 | 1.305396  |

|      |           |          |           |
|------|-----------|----------|-----------|
| 41.C | 1.090015  | 3.203375 | 0.154799  |
| 42.H | 0.824936  | 2.718438 | -0.799809 |
| 43.H | 2.18089   | 3.174672 | 0.281309  |
| 44.H | 0.781847  | 4.257831 | 0.103128  |
| 45.C | -1.141512 | 2.491646 | 1.031095  |
| 46.H | -1.335079 | 1.988537 | 0.069215  |
| 47.H | -1.515638 | 3.52165  | 0.946288  |
| 48.H | -1.725657 | 1.969874 | 1.799241  |
| 49.C | 0.88527   | 1.015515 | 1.370455  |
| 50.H | 0.31076   | 0.405411 | 2.081253  |
| 51.H | 1.949527  | 0.971756 | 1.646718  |
| 52.H | 0.775519  | 0.551425 | 0.376222  |
| 53.C | 0.273835  | 2.527358 | 4.499664  |
| 54.C | -1.199804 | 2.086962 | 4.443571  |
| 55.H | -1.36157  | 1.264782 | 3.733411  |
| 56.H | -1.872115 | 2.917142 | 4.181141  |
| 57.H | -1.501135 | 1.721351 | 5.439415  |
| 58.C | 1.180077  | 1.315937 | 4.791206  |
| 59.H | 0.928236  | 0.918254 | 5.788727  |
| 60.H | 2.242294  | 1.601245 | 4.790828  |
| 61.H | 1.043814  | 0.502721 | 4.066804  |
| 62.C | 0.452419  | 3.559863 | 5.631822  |
| 63.H | -0.209433 | 4.427204 | 5.500477  |
| 64.H | 1.489646  | 3.923718 | 5.67005   |
| 65.H | 0.212481  | 3.078225 | 6.594126  |

**Table S2.** Complex **2** coordinates used in calculations.

Iridium Azide Complex—Coordinates

|      |           |           |           |
|------|-----------|-----------|-----------|
| 1.Ir | -0.725591 | -1.142321 | 0.171785  |
| 2.N  | -1.596409 | 0.66319   | 0.270197  |
| 3.H  | 2.57813   | 2.385428  | 1.494469  |
| 4.N  | 0.021108  | -3.01359  | 0.197165  |
| 5.C  | 3.290977  | 1.588543  | 1.242453  |
| 6.N  | 1.133967  | -3.498873 | 0.206906  |
| 7.N  | 2.14359   | -4.082492 | 0.233414  |
| 8.H  | 4.294082  | -0.682728 | 0.078712  |
| 9.H  | 4.051771  | 1.560335  | 2.040472  |
| 10.P | -2.931613 | -1.894404 | 0.436102  |
| 11.C | -2.963696 | 0.78611   | 0.484105  |
| 12.C | -3.775641 | -0.294261 | 0.602397  |
| 13.C | -0.856023 | 1.830921  | 0.135208  |
| 14.C | 0.481056  | 1.807818  | -0.079744 |

|      |           |           |           |
|------|-----------|-----------|-----------|
| 15.P | 1.218805  | 0.145882  | -0.175521 |
| 16.H | 3.802388  | 1.859681  | 0.310246  |
| 17.C | 2.603834  | 0.211252  | 1.170472  |
| 18.C | 1.870478  | -0.039044 | 2.505062  |
| 19.H | 2.594635  | 0.030951  | 3.33433   |
| 20.H | 1.080602  | 0.707041  | 2.676631  |
| 21.H | 1.4046    | -1.033519 | 2.529626  |
| 22.C | 3.666904  | -0.88097  | 0.959087  |
| 23.H | 3.232819  | -1.884849 | 0.855142  |
| 24.H | 4.334599  | -0.899086 | 1.836782  |
| 25.H | -5.38919  | -3.850228 | -0.245978 |
| 26.C | -3.716956 | -2.71368  | -1.117321 |
| 27.C | -3.533237 | -1.685064 | -2.252773 |
| 28.H | -3.876546 | -2.132152 | -3.200274 |
| 29.H | -4.112281 | -0.768245 | -2.072902 |
| 30.H | -2.474925 | -1.405357 | -2.3612   |
| 31.C | -2.933661 | -3.988562 | -1.488221 |
| 32.H | -1.856155 | -3.787034 | -1.564231 |
| 33.H | -3.28911  | -4.351515 | -2.467419 |
| 34.H | -3.076784 | -4.798885 | -0.762496 |
| 35.C | -5.212992 | -3.03324  | -0.958617 |
| 36.H | -5.793892 | -2.156056 | -0.638187 |
| 37.H | -5.616668 | -3.358015 | -1.932498 |
| 38.H | -1.432292 | -2.279891 | 2.922518  |
| 39.C | -3.368325 | -2.840555 | 2.049724  |
| 40.C | -4.848581 | -2.711779 | 2.453416  |
| 41.H | -5.000017 | -3.229278 | 3.415598  |
| 42.H | -5.139464 | -1.661398 | 2.596075  |
| 43.H | -5.531266 | -3.165676 | 1.724572  |
| 44.C | -2.97677  | -4.324597 | 1.926494  |
| 45.H | -3.657387 | -4.876956 | 1.264012  |
| 46.H | -3.034715 | -4.795201 | 2.92215   |
| 47.H | -1.949081 | -4.442996 | 1.553644  |
| 48.C | -2.503337 | -2.179591 | 3.144155  |
| 49.H | -2.729589 | -1.107827 | 3.243562  |
| 50.H | -2.713812 | -2.666339 | 4.11134   |
| 51.H | 2.832391  | 2.085635  | -1.939128 |
| 52.C | 1.964549  | 0.063089  | -1.947844 |
| 53.C | 2.423618  | -1.375508 | -2.253976 |
| 54.H | 2.783542  | -1.42057  | -3.295654 |
| 55.H | 3.239959  | -1.714432 | -1.604119 |
| 56.H | 1.589339  | -2.084208 | -2.156124 |
| 57.C | 0.804458  | 0.412047  | -2.902365 |
| 58.H | -0.060002 | -0.245167 | -2.726505 |



|      |           |           |           |
|------|-----------|-----------|-----------|
| 59.H | 1.142233  | 0.274588  | -3.942979 |
| 60.H | 0.472658  | 1.452878  | -2.781054 |
| 61.C | 3.120608  | 1.050798  | -2.175083 |
| 62.H | 4.01226   | 0.7933    | -1.587995 |
| 63.H | 3.411136  | 1.024955  | -3.238784 |
| 64.H | -3.352359 | 1.808333  | 0.551193  |
| 65.H | -4.84579  | -0.167678 | 0.762483  |
| 66.H | 1.038803  | 2.736689  | -0.19137  |
| 67.H | -1.413742 | 2.770927  | 0.209667  |

**Table S3.** Complex **3** coordinates used in calculations.

Iridium Nitrosyl Complex—C oordinates

|      |           |           |           |
|------|-----------|-----------|-----------|
| 1.Ir | -0.597821 | -1.341953 | -0.273545 |
| 2.N  | -0.386032 | -1.479713 | 1.705612  |
| 3.H  | 1.467429  | 0.82764   | -2.72398  |
| 4.C  | 4.03626   | 0.44091   | 0.669539  |
| 5.C  | 1.88837   | 1.663572  | -2.147445 |
| 6.H  | 3.829682  | 1.014602  | 1.584736  |
| 7.H  | 4.976093  | -0.10824  | 0.837759  |
| 8.H  | 2.915231  | 2.792648  | 0.219612  |
| 9.H  | 1.750757  | 2.578391  | -2.744796 |
| 10.P | -2.823892 | -1.900356 | 0.482293  |
| 11.C | -1.326574 | -1.197163 | 2.671903  |
| 12.C | -2.749307 | -1.102607 | 2.212186  |
| 13.C | 0.015234  | -0.486628 | 2.576981  |
| 14.C | 0.668157  | 0.713124  | 1.95924   |
| 15.P | 1.188499  | 0.20888   | 0.196461  |
| 16.H | 2.96846   | 1.505244  | -2.036901 |
| 17.C | 1.18217   | 1.852918  | -0.791105 |
| 18.C | -0.289765 | 2.236813  | -1.03971  |
| 19.H | -0.313916 | 3.209249  | -1.555923 |
| 20.H | -0.80519  | 1.502856  | -1.670347 |
| 21.H | -0.859677 | 2.347721  | -0.105981 |
| 22.C | 1.859161  | 2.988737  | 0.005428  |
| 23.H | 1.344083  | 3.199231  | 0.952957  |
| 24.H | 1.809354  | 3.907709  | -0.599554 |
| 25.H | -5.912782 | -1.850517 | 0.840478  |
| 26.C | -4.277039 | -0.998714 | -0.386187 |
| 27.C | -3.792324 | 0.420541  | -0.743321 |
| 28.H | -4.629989 | 0.969301  | -1.201329 |
| 29.H | -3.472613 | 0.99067   | 0.140759  |

|      |           |           |           |
|------|-----------|-----------|-----------|
| 30.H | -2.962082 | 0.403804  | -1.459145 |
| 31.C | -4.666402 | -1.739235 | -1.679661 |
| 32.H | -3.808881 | -1.884846 | -2.35169  |
| 33.H | -5.41069  | -1.134028 | -2.220333 |
| 34.H | -5.124467 | -2.715881 | -1.478599 |
| 35.C | -5.501174 | -0.879248 | 0.545611  |
| 36.H | -5.280906 | -0.303332 | 1.455037  |
| 37.H | -6.291759 | -0.336334 | 0.00412   |
| 38.H | -3.553761 | -4.245754 | -1.365321 |
| 39.C | -3.143331 | -3.772118 | 0.759755  |
| 40.C | -2.124382 | -4.251736 | 1.814972  |
| 41.H | -2.24396  | -5.339355 | 1.936433  |
| 42.H | -1.089037 | -4.061267 | 1.502782  |
| 43.H | -2.281727 | -3.791483 | 2.800715  |
| 44.C | -4.567906 | -4.089112 | 1.250479  |
| 45.H | -4.827114 | -3.550951 | 2.17389   |
| 46.H | -4.624637 | -5.165405 | 1.477349  |
| 47.H | -5.332287 | -3.87724  | 0.491841  |
| 48.C | -2.853119 | -4.511978 | -0.563896 |
| 49.H | -1.82984  | -4.315783 | -0.915768 |
| 50.H | -2.946237 | -5.594862 | -0.387462 |
| 51.H | 4.214845  | 1.143049  | -0.154908 |
| 52.C | 2.929269  | -0.579151 | 0.348101  |
| 53.C | 2.857823  | -1.624462 | 1.481415  |
| 54.H | 3.832509  | -2.132994 | 1.538764  |
| 55.H | 2.662148  | -1.175591 | 2.465537  |
| 56.H | 2.092344  | -2.387639 | 1.288547  |
| 57.C | 3.237777  | -1.318605 | -0.971046 |
| 58.H | 2.4603    | -2.060872 | -1.204031 |
| 59.H | 4.19176   | -1.856453 | -0.856744 |
| 60.H | 3.340268  | -0.641337 | -1.828097 |
| 61.N | -0.744076 | -1.312009 | -2.07069  |
| 62.O | -0.915646 | -1.136567 | -3.226822 |
| 63.H | -3.451294 | -1.588174 | 2.90538   |
| 64.H | -3.064585 | -0.049694 | 2.113461  |
| 65.H | -0.045026 | 1.55078   | 1.872428  |
| 66.H | 1.527807  | 1.07463   | 2.541739  |

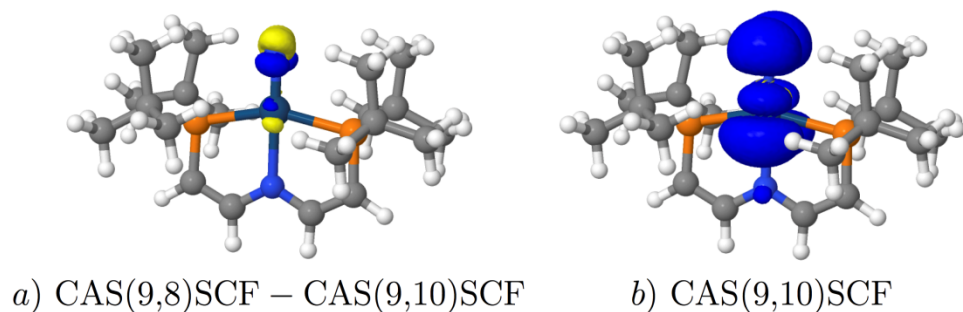

**Figure S1.** Complex 1 a) magnetization density difference plot between CAS(9,8) and CAS(9,10)SCF and b) magnetization density plot of CAS(9,10)SCF where blue is  $\alpha$ -density and yellow is  $\beta$ -density.

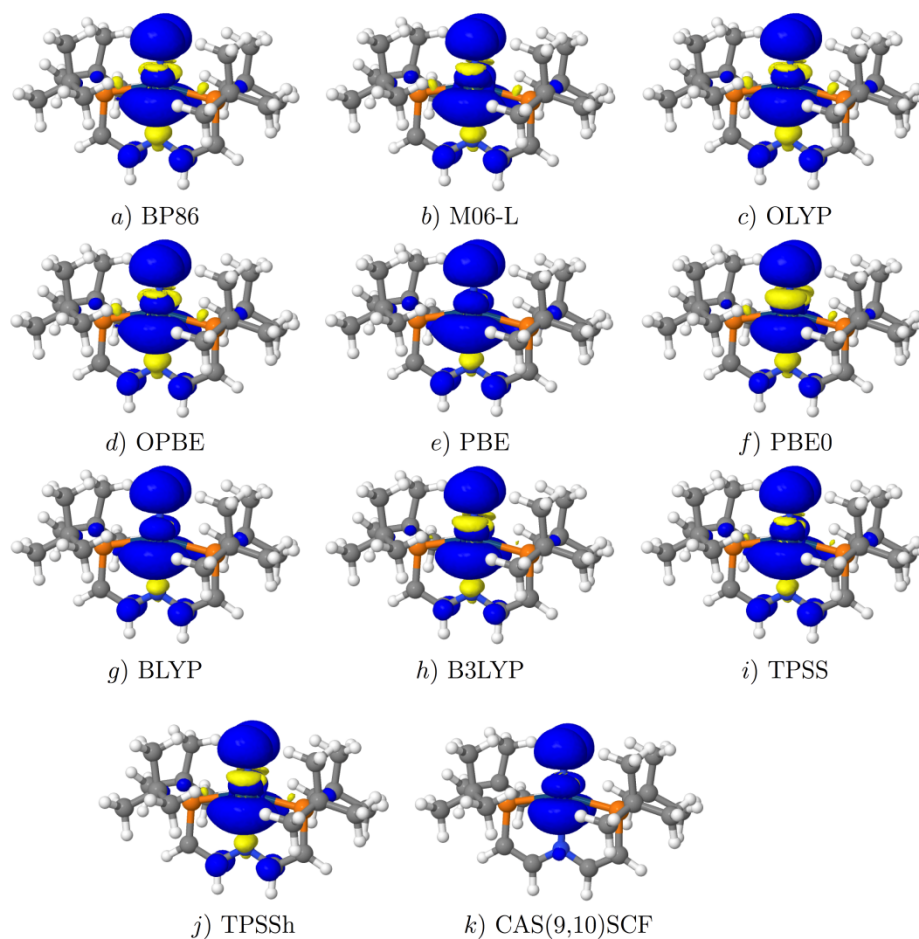

**Figure S2.** Complex 1 magnetization density plots of DFT and CASSCF methods where blue is  $\alpha$ -density and yellow is  $\beta$ -density.

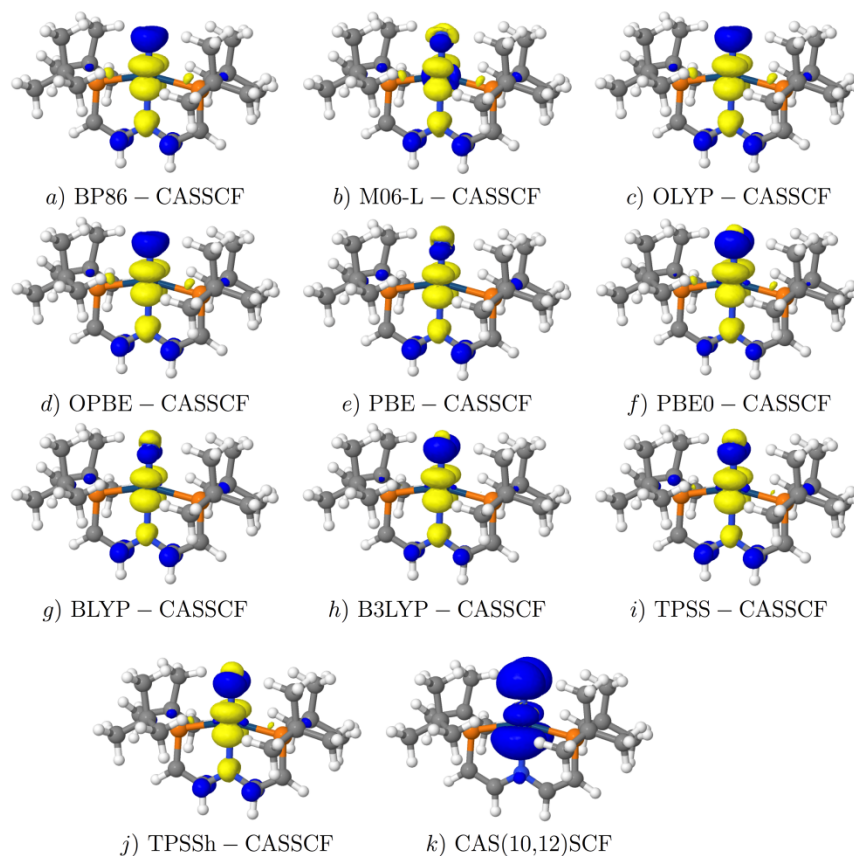

**Figure S3.** Complex 1 DFT-CASSCF magnetization density difference plots where blue is  $\alpha$ -density and yellow is  $\beta$ -density.

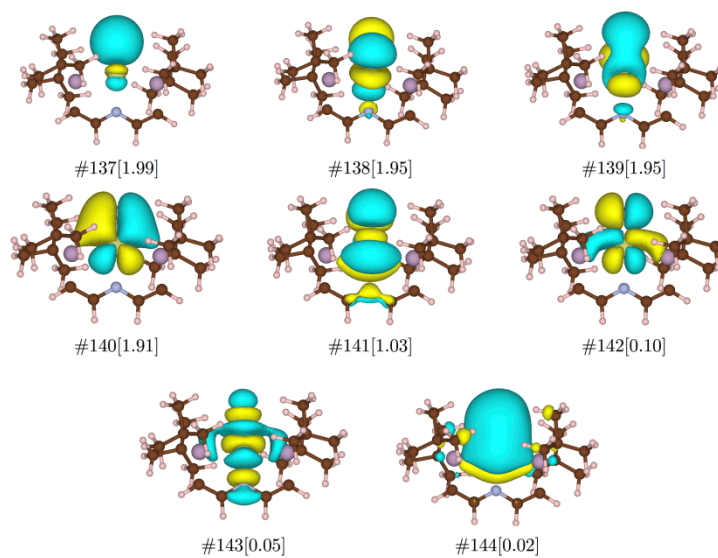

**Figure S4.** CAS(9,8)SCF orbitals and their natural occupation numbers for complex 1.

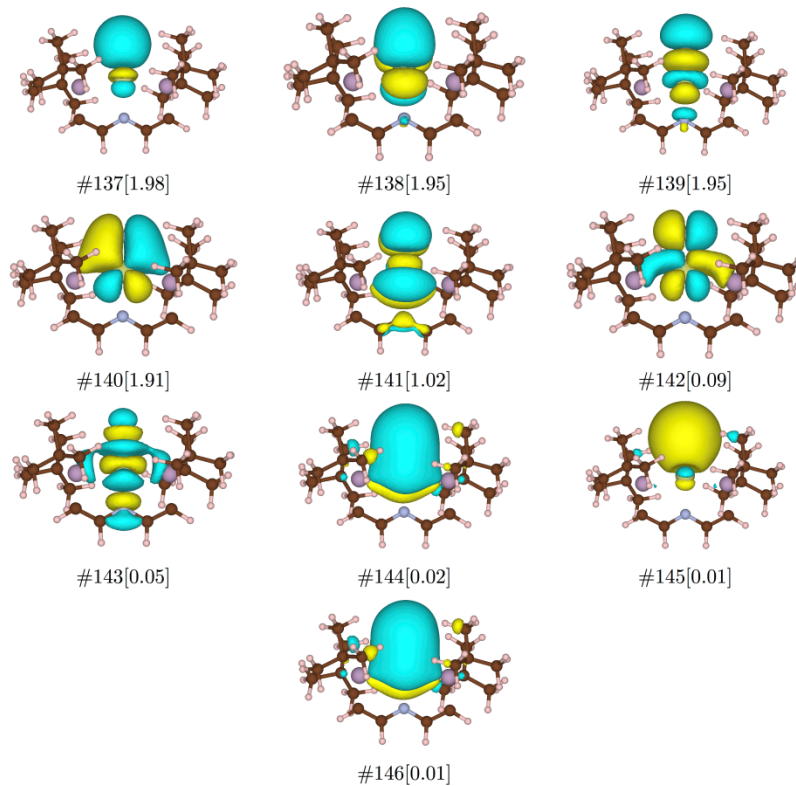

**Figure S5.** CAS(9,10)SCF orbitals and their natural occupation numbers for complex 1.

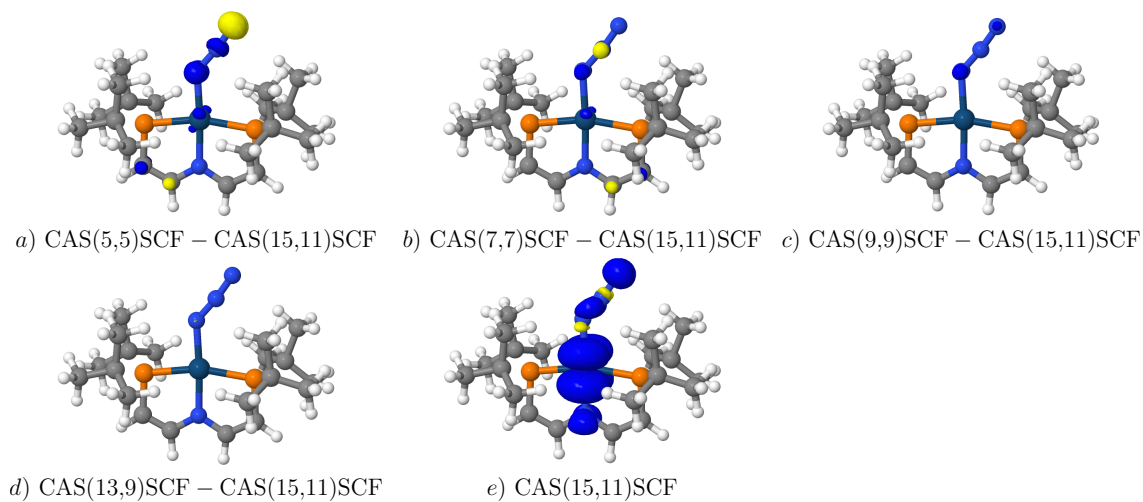

**Figure S6.** Complex 2 CASSCF-CASSCF magnetization density difference plots and magnetization density plot of CAS(15,11)SCF where blue is  $\alpha$ -density and yellow is  $\beta$ -density.

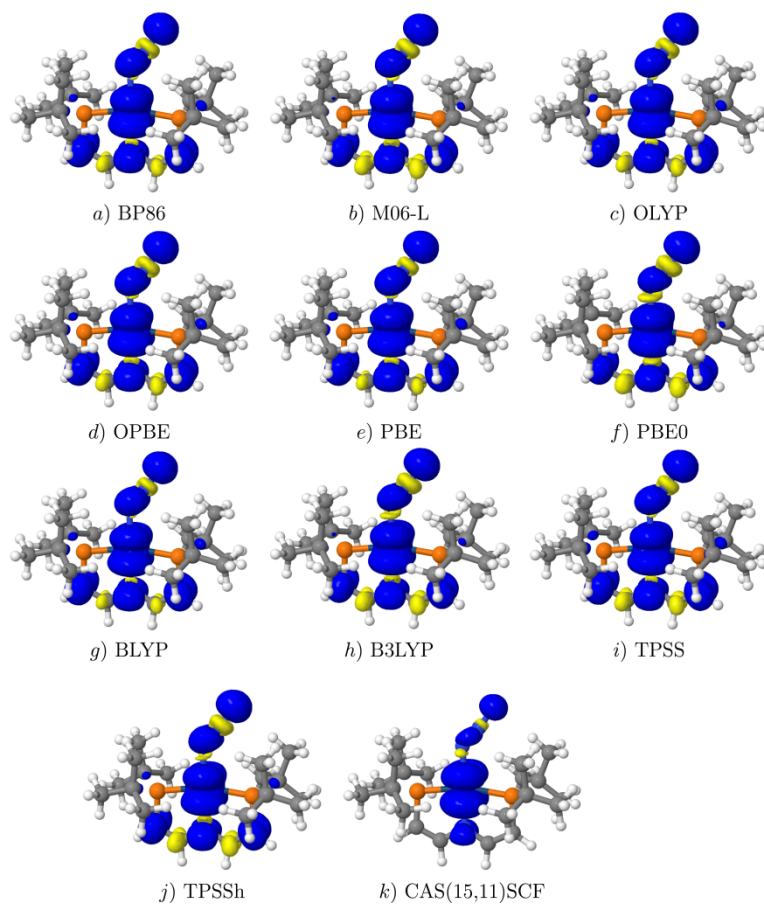

**Figure S7.** Complex 2 magnetization density plots of DFT and CASSCF methods where blue is  $\alpha$ -density and yellow is  $\beta$ -density.

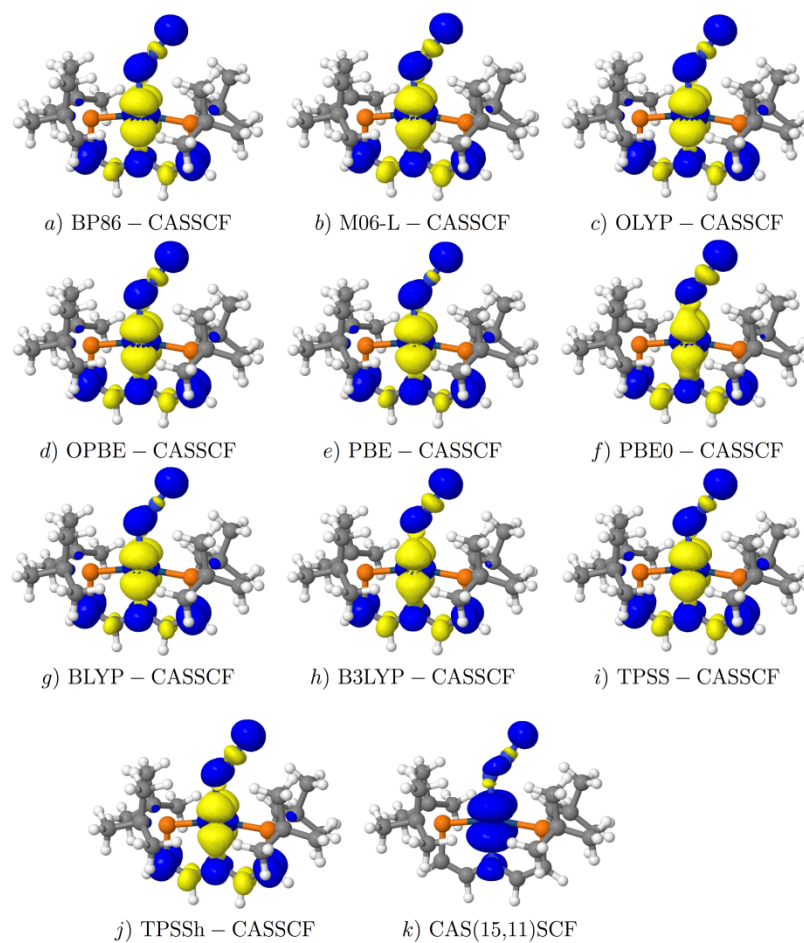

**Figure S8.** Complex 2 DFT-CASSCF magnetization density difference plots and CASSCF reference magnetization density where blue is  $\alpha$ -density and yellow is  $\beta$ -density.

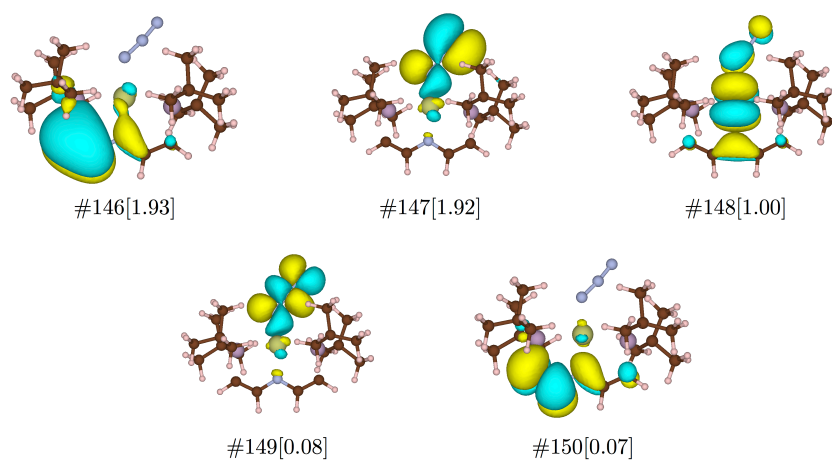

**Figure S9.** CAS(5,5)SCF orbitals and their natural occupation numbers for complex 2.



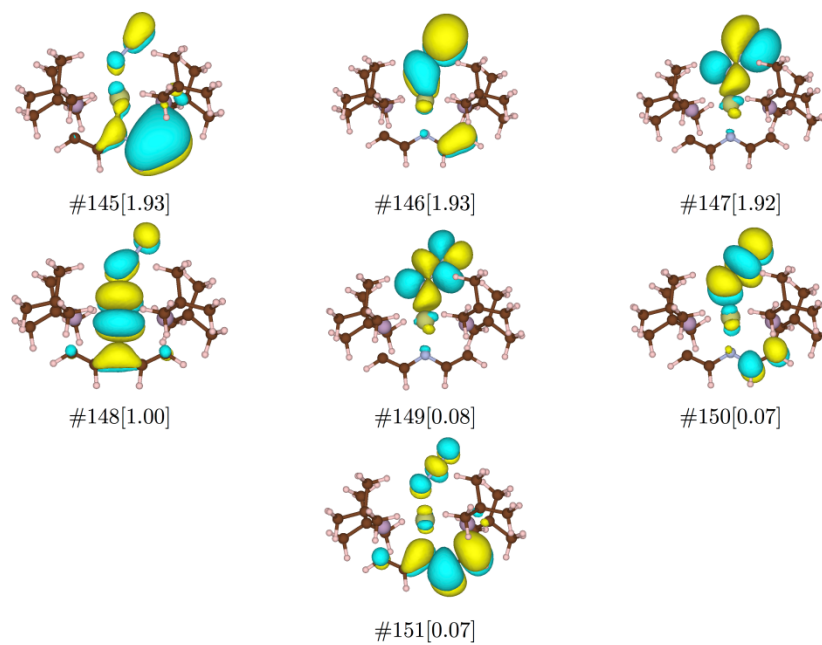

**Figure S10.** CAS(7,7)SCF orbitals and their natural occupation numbers for complex 2.

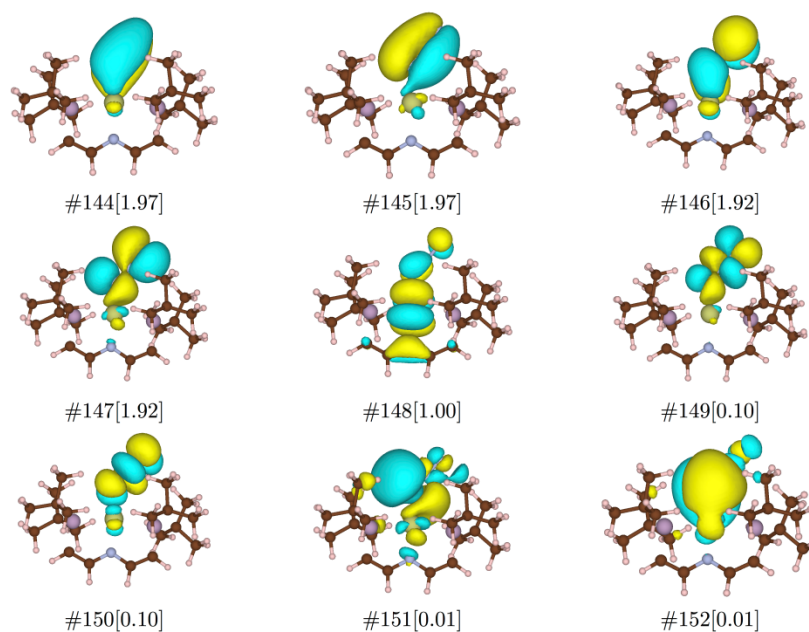

**Figure S11.** CAS(9,9)SCF orbitals and their natural occupation numbers for complex 2.



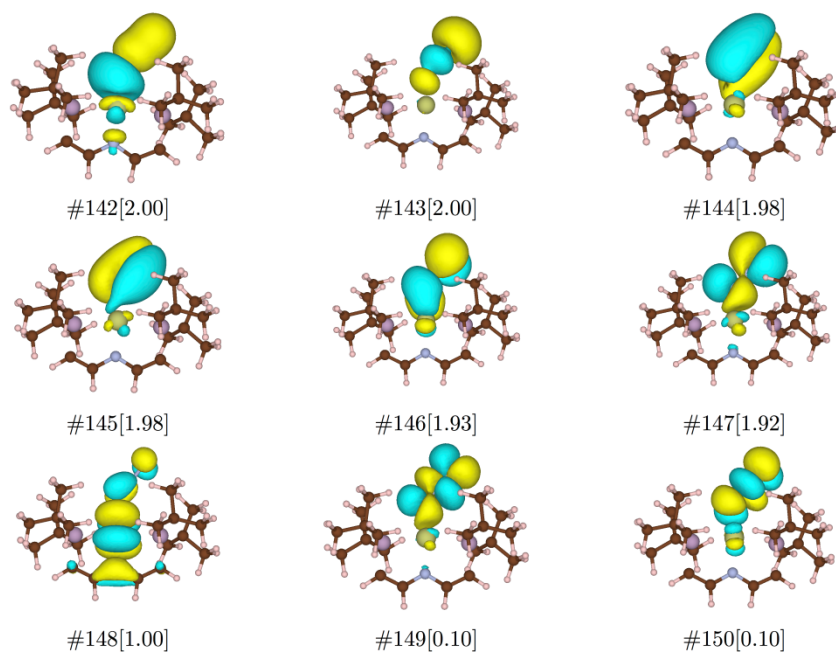

**Figure S12.** CAS(13,9)SCF orbitals and their natural occupation numbers for complex 2.

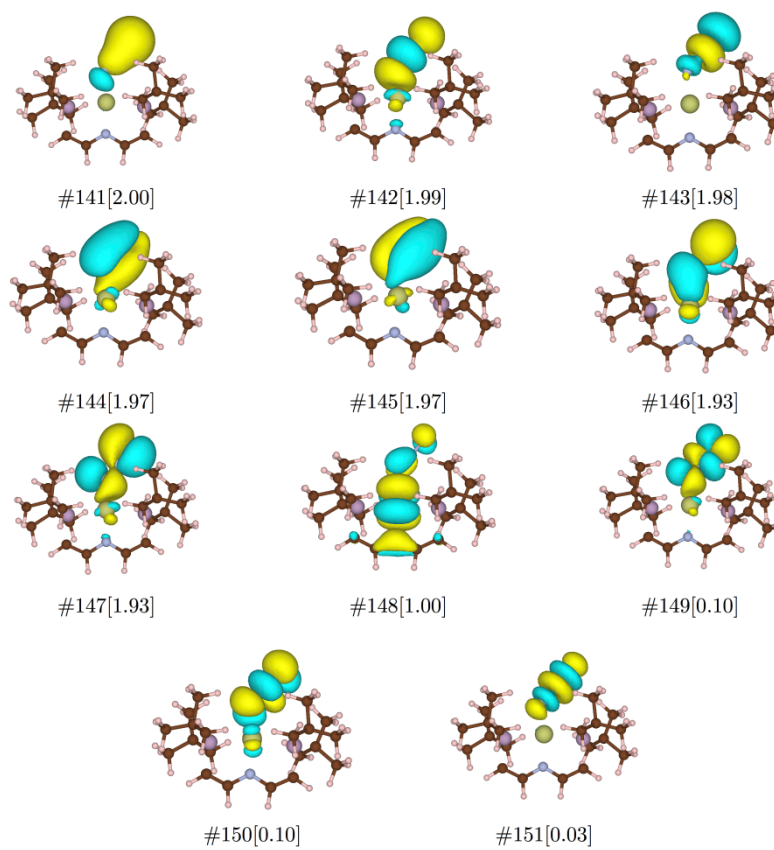

**Figure S13.** CAS(15,11)SCF orbitals and their natural occupation numbers for complex 2.

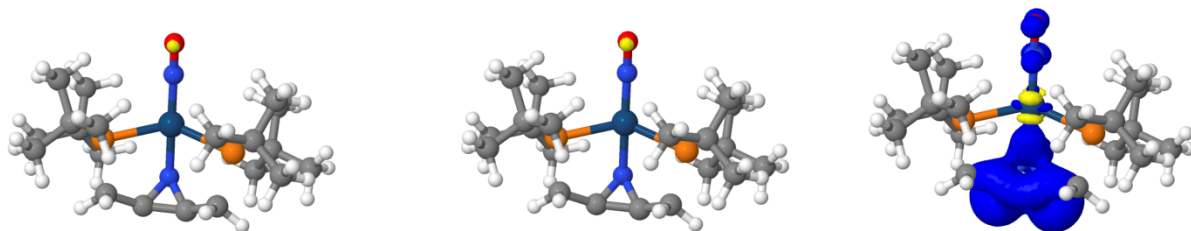

a) CAS(6,6)SCF – CAS(10,12)SCF    b) CAS(8,8)SCF – CAS(10,12)SCF    c) CAS(10,12)SCF

**Figure S14.** Complex **3** CASSCF-CASSCF magnetization density difference plots and magnetization density plot of CAS(10,12)SCF where blue is  $\alpha$ -density and yellow is  $\beta$ -density.

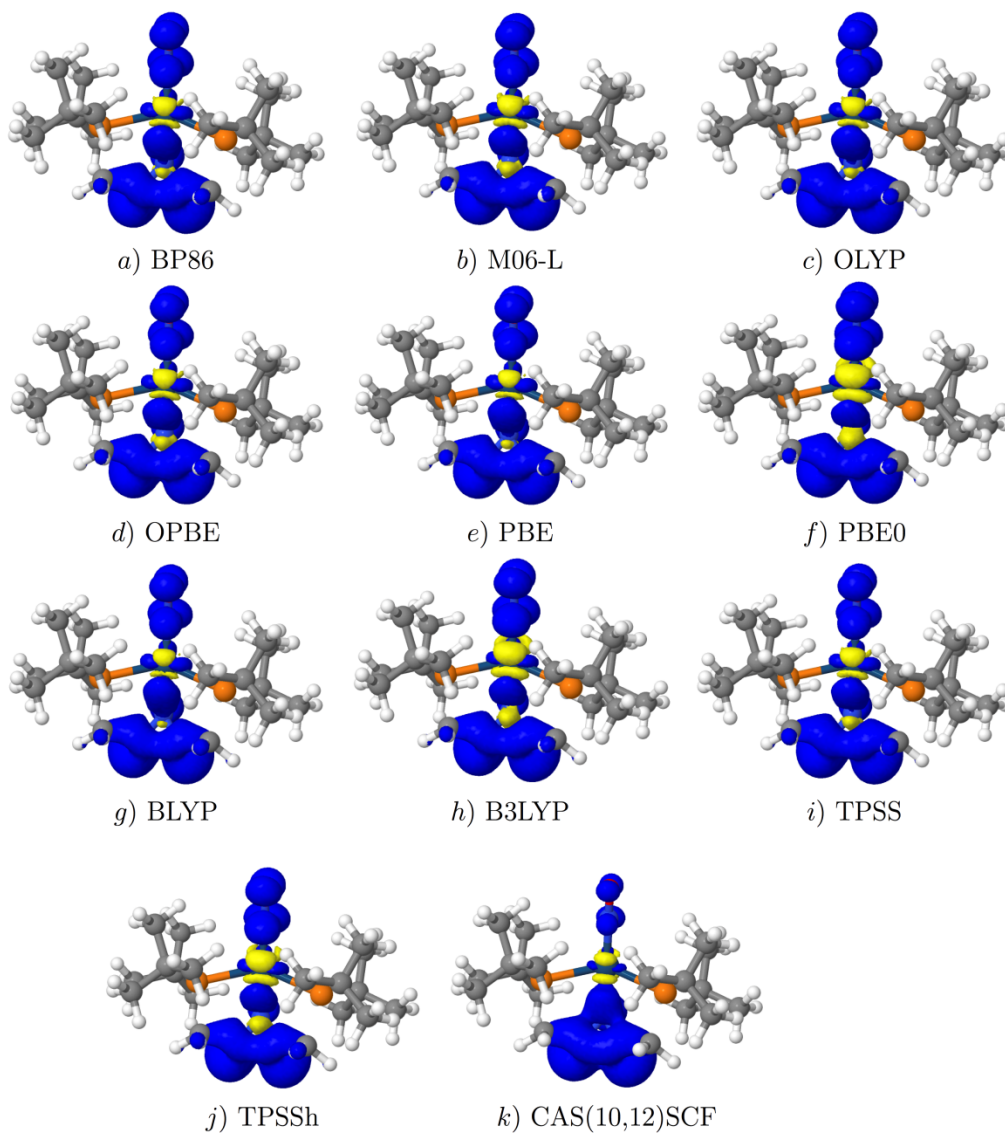

**Figure S15.** Complex **3** magnetization density plots of DFT and CASSCF methods where blue is  $\alpha$ -density and yellow is  $\beta$ -density.

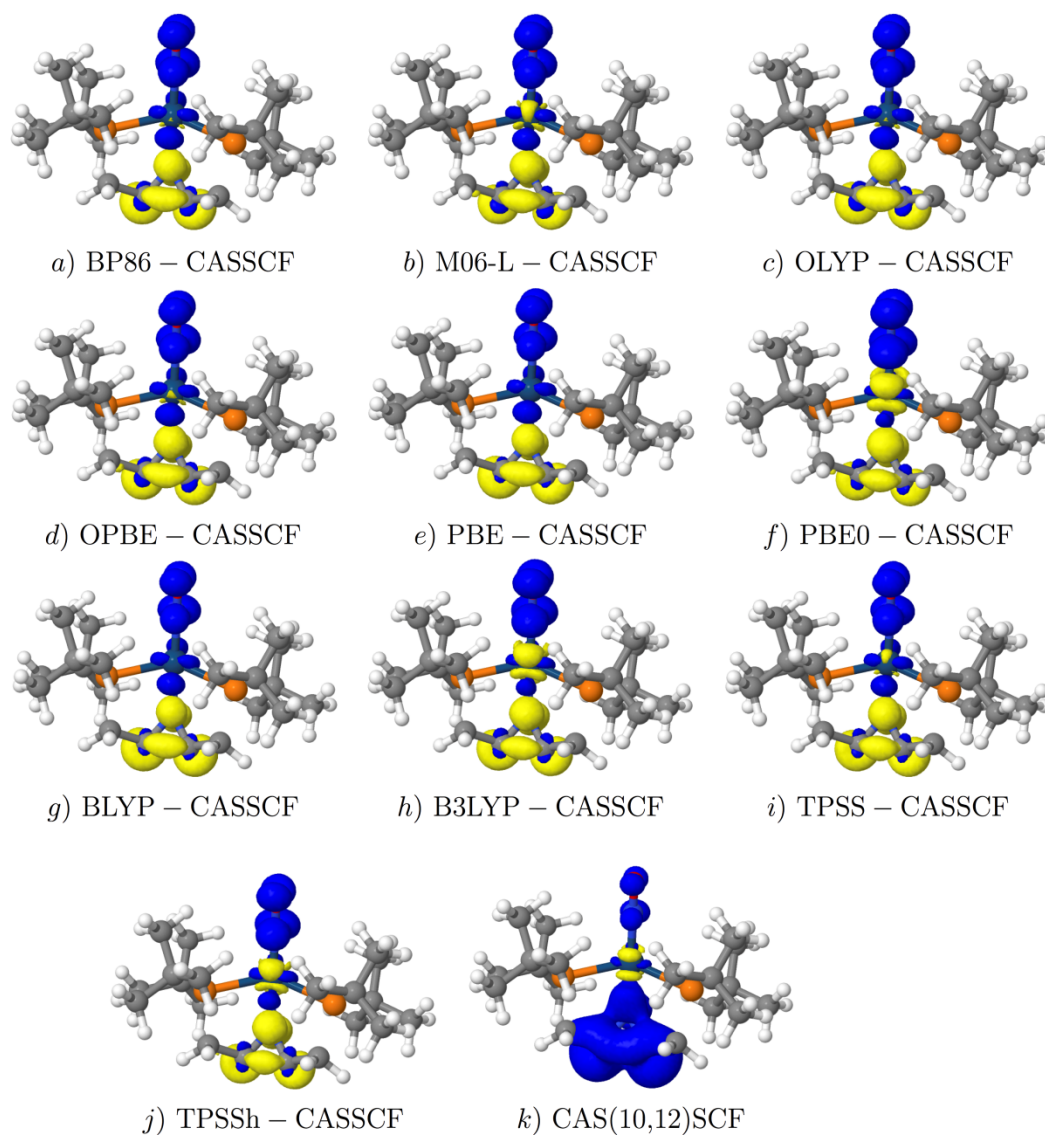

**Figure S16.** Complex 3 DFT-CASSCF magnetization density difference plots where blue is  $\alpha$ -density and yellow is  $\beta$ -density.

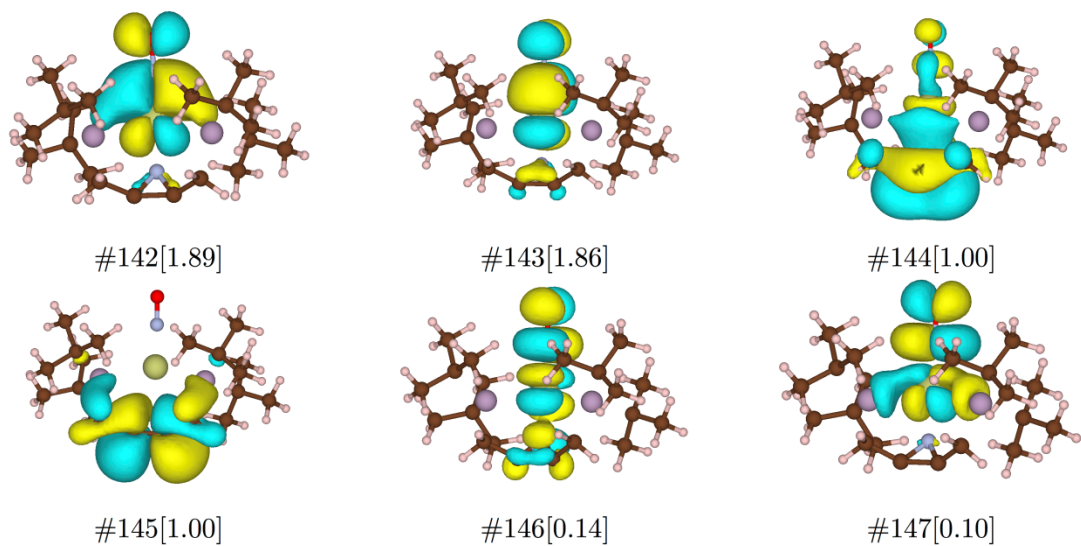

**Figure S17.** CAS(6,6)SCF orbitals and their natural occupation numbers for complex 3.

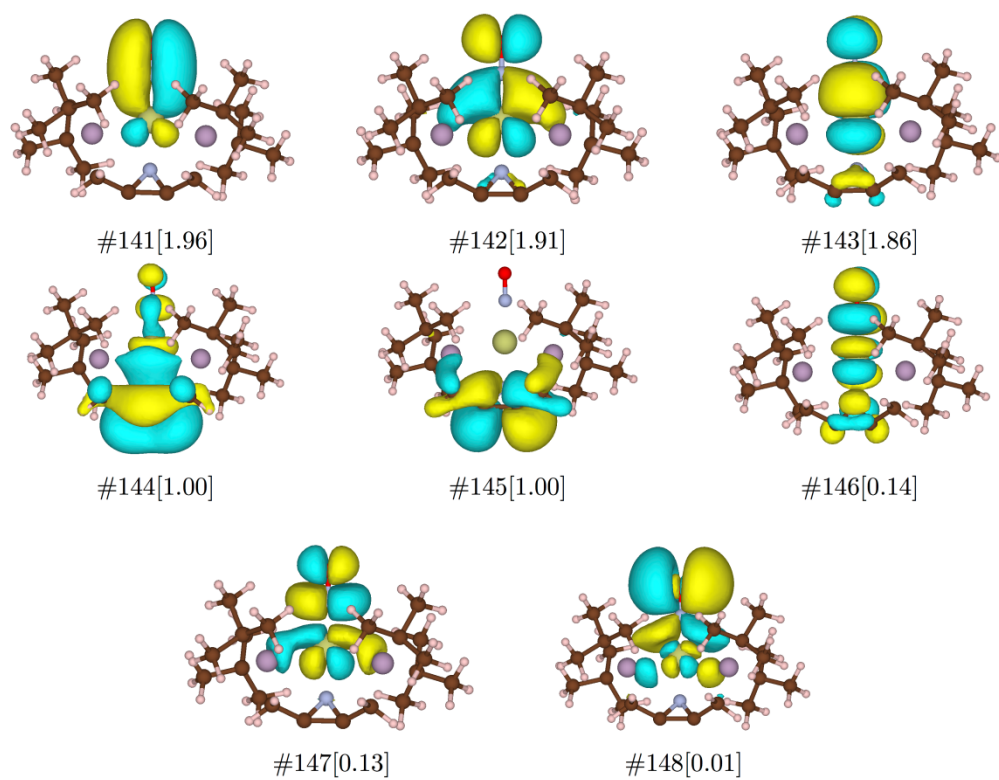

**Figure S18.** CAS(8,8)SCF orbitals and their natural occupation numbers for complex 3.

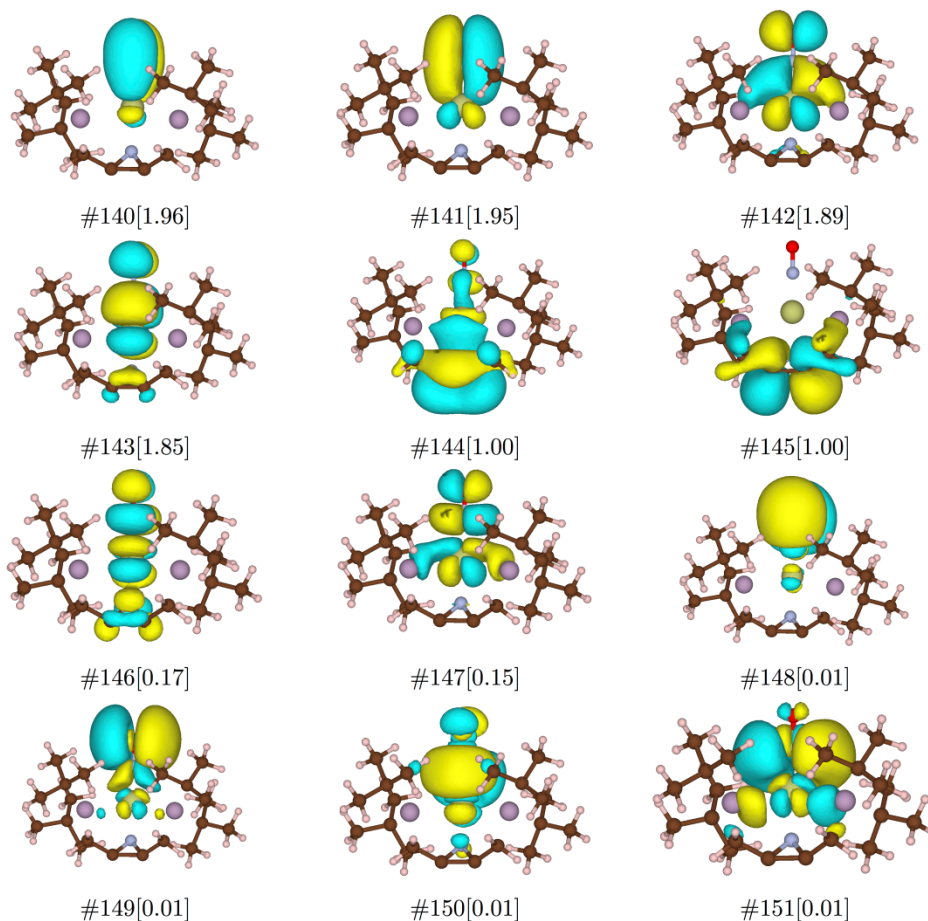

**Figure S19.** CAS(10,12)SCF orbitals and their natural occupation numbers for complex 3.

**Table S4:** Total spin expectation values  $\langle S^2 \rangle$  calculated for various exchange-correlation functionals and complexes 1, 2, and 3. The ideal value is also given.

| Method | 1                           |                       | 2                           |                       | 3                           |                       |
|--------|-----------------------------|-----------------------|-----------------------------|-----------------------|-----------------------------|-----------------------|
|        | ideal $\langle S^2 \rangle$ | $\langle S^2 \rangle$ | ideal $\langle S^2 \rangle$ | $\langle S^2 \rangle$ | ideal $\langle S^2 \rangle$ | $\langle S^2 \rangle$ |
| B3LYP  | 0.7500                      | 0.7580                | 0.7500                      | 0.7586                | 2.0000                      | 2.0549                |
| BLYP   | 0.7500                      | 0.7537                | 0.7500                      | 0.7526                | 2.0000                      | 2.0137                |
| BP86   | 0.7500                      | 0.7543                | 0.7500                      | 0.7531                | 2.0000                      | 2.0160                |
| M06-L  | 0.7500                      | 0.7554                | 0.7500                      | 0.7573                | 2.0000                      | 2.0277                |
| OLYP   | 0.7500                      | 0.7566                | 0.7500                      | 0.7532                | 2.0000                      | 2.0169                |
| OPBE   | 0.7500                      | 0.7576                | 0.7500                      | 0.7536                | 2.0000                      | 2.0195                |
| PBE    | 0.7500                      | 0.7539                | 0.7500                      | 0.7528                | 2.0000                      | 2.0148                |
| PBE0   | 0.7500                      | 0.7603                | 0.7500                      | 0.7614                | 2.0000                      | 2.0783                |
| TPSSH  | 0.7500                      | 0.7579                | 0.7500                      | 0.7576                | 2.0000                      | 2.0420                |
| TPSS   | 0.7500                      | 0.7555                | 0.7500                      | 0.7544                | 2.0000                      | 2.0229                |
